# Supplementary material for: Detection rate of actionable mutations in diverse cancers using a biopsy-free (blood) circulating tumor cell DNA assay
Source: PubMed Central journal article supplement (PMC4891078; doi:10.18632/oncotarget.7110), 2016-02-01
Supplement: oncotarget-07-09707-s001.pdf [file oncotarget-07-09707-s001.pdf]

## SUPPLEMENTARY TABLE

Supplementary Table S1: Guardant360 54 gene cell-free DNA NGS panel

|                       |                    |                      |                     |                      |                      |
|-----------------------|--------------------|----------------------|---------------------|----------------------|----------------------|
| <i>ABL1</i>           | <i>AKT1</i>        | <i>ALK</i>           | <i>APC</i>          | <i>AR</i>            | <i>ATM</i>           |
| <b><i>BRAF</i></b>    | <i>CDH1</i>        | <b><i>CDKN2A</i></b> | <i>CSF1R</i>        | <i>CTBBB1</i>        | <b><i>EGFR</i></b> * |
| <b><i>ERBB2</i></b> * | <i>ERBB4</i>       | <i>EZH2</i>          | <b><i>FBXW7</i></b> | <i>FGFR1</i>         | <i>FGFR2</i>         |
| <i>FGFR3</i>          | <i>FLT3</i>        | <i>GNAI1</i>         | <i>GNAQ</i>         | <i>GNAS</i>          | <i>HNFI1A</i>        |
| <i>HRAS</i>           | <i>IDH1</i>        | <i>IDH2</i>          | <i>JAK2</i>         | <i>JAK3</i>          | <i>KDR</i>           |
| <i>KIT</i>            | <b><i>KRAS</i></b> | <b><i>MET</i></b> *  | <i>MLH1</i>         | <i>MPL</i>           | <b><i>MYC</i></b>    |
| <b><i>NOTCH1</i></b>  | <i>NPM1</i>        | <b><i>NRAS</i></b>   | <i>PDGFRA</i>       | <b><i>PIK3CA</i></b> | <i>PTPN11</i>        |
| <b><i>PTEN</i></b>    | <b><i>PROC</i></b> | <b><i>RB1</i></b>    | <i>RET</i>          | <i>SMAD4</i>         | <i>SMARCB1</i>       |
| <i>SMO</i>            | <i>SRC</i>         | <i>STK11</i>         | <i>TERT</i>         | <b><i>TP53</i></b>   | <i>VHL</i>           |

Complete exon coverage for genes in bold. Unbolded genes had critical exon coverage.

\*Copy number amplification of *EGFR*, *ERBB2* (HER2) and *MET* genes was done (in addition of mutations (complete exon coverage)).
